# Supplementary material
Source: PubMed Central journal article supplement (PMC3389971)
Supplement: supp_112.139642_139642SI.pdf [file supp_112.139642_139642SI.pdf]

Table S1 *Ds* insertion sites in yeast

| Ade <sup>+</sup> rev        | Chr            | Position            | <i>Ds</i> target site <sup>a</sup> | Accession      | E-value <sup>d</sup> | Gene                                                                  |
|-----------------------------|----------------|---------------------|------------------------------------|----------------|----------------------|-----------------------------------------------------------------------|
| <b>ActPase<sub>4x</sub></b> |                |                     |                                    |                |                      |                                                                       |
| 1                           | XIII           | 311423              | TTGGCCAA                           | NM_001182514.1 | 3e -19               | S288c Putative protein with similarity to human PEX5Rp                |
| 2                           | XII            | 458235              | CAAAGAGT                           | FN554374.1     | 8e -144              | Partial 5S rRNA gene                                                  |
| 3                           | XI             | 264064              | CCCCAGAT                           | X71133.1       | 1e -75               | HAP4, AAT1, GFA1, LAP4 and MBR1 genes                                 |
| 4                           | XV             | 323245              | <b>GCACTTTC</b>                    | Z74744.1       | 0.0                  | Chromosome XV reading frame ORF YOL002c                               |
| 5                           | XII            | 693673              | <b>GTTTCATC</b>                    | U09242.1       | 0.0                  | DNA replication protein Cdc46p (CDC46) gene                           |
| 6                           | VII            | 440638              | CTTATTTT                           | Z72551.1       | 3e -32               | Chromosome VII reading frame ORF YGL029w                              |
| 7                           | II             | 792133              | <b>AAAATGTT</b>                    | AB200246.1     | 0.0                  | BIO6 gene for biotin biosynthesis enzyme                              |
| 8                           | XI             | 478727              | <b>GACTCTTT</b>                    | NM_001179810.1 | 7e -112              | S288c Component of GARP (Golgi associated retrograde protein) complex |
| 9                           | VII            | 465531              | <b>GAGAATAG</b>                    | S58126.1       | 7e -51               | LEU1-ATE1 loci: LEU1...YGL029                                         |
| 10                          | IV             | 302350              | AAAAAAGG                           | Z74134.1       | 1e -105              | Chromosome IV reading frame ORF YDL086w                               |
| 11                          | XV             | 637133 <sup>e</sup> | GCCCTAAT                           | NM_001183580.1 | 7e -170              | S288c Pns1p (PNS1)                                                    |
| 12                          | XVI            | 688009              | TAGAAAAT                           | NM_001184168.1 | 2e -85               | S288c Putative membrane protein                                       |
| 13                          | XV             | 552278 <sup>e</sup> | <b>AGTTTTCT</b>                    | M23369.1       | 0.0                  | Profilin (PFY) gene                                                   |
| 14                          | XII            | 390865              | <b>AAAATACG</b>                    | Z73293.1       | 0.0                  | Chromosome XII reading frame ORF YLR121c                              |
| 15                          | IV             | 239896              | <b>GTGGCCAA</b>                    | X56956.1       | 4e -80               | CDC48 gene for cell cycle protein CDC48p                              |
| 16                          | XV             | 525094 <sup>e</sup> | ATCCGAAT                           | NM_001183528.1 | 0.0                  | S288c Inp53p (INP53)                                                  |
| 17                          | IX             | 388640              | GTACAGAA                           | BK006942.2     | 8e -34               | S288c chromosome IX complete sequence                                 |
| 18                          | XV             | 170355              | CCCCTTGC                           | M83139.1       | 1e -101              | RAS1 and RAS2 attenuator (IRA2) gene, 5' end                          |
| 19                          | XII            | 457081              | <b>GCCAACCG</b>                    | BK006945.1     | 0.0                  | Isolate OC21 18S ribosomal RNA gene                                   |
| 20                          | II             | 466515              | GTCCACGT                           | X66247.1       | 5e -146              | YSA1, SSN6, RAD16, and LYS2 genes                                     |
| 21                          | XV             | 226759              | TTCATATG                           | Z74797.1       | 5e -146              | Chromosome XV reading frame ORF YOL055c                               |
| 22                          | V              | 41348               | CATTTGGG                           | NM_001178875.1 | 0.0                  | S288c Prb1p (PRB1), mRNA, (Protease B)                                |
| 23                          | X              | 106834              | <b>ATTTATTT</b>                    | U15300.1       | 7e -22               | Hal5p (HAL5) mRNA                                                     |
| 24                          | XVI            | 501953              | CTGCCGCG                           | U30613.1       | 0.0                  | Suppressor kinase of snf3, Sks1p (SKS1) gene                          |
| 25                          | XV             | 587811 <sup>e</sup> | <b>GGCATGGT</b>                    | NM_001183559.1 | 0.0                  | S288c Sfl1p (SFL1)                                                    |
| 26                          | II             | 10413               | TTTCTAAG                           | NM_001178347.1 | 199                  | S288c Putative protein of unknown function                            |
| 27                          | VII            | 871291              | GAGCTCAA                           | U27358.1       | 6e -130              | Hgh1p (HGH1) gene                                                     |
| 28                          | VII            | 73860               | TTAATTAC                           | Z72748.1       | 0.0                  | Chromosome VII reading frame ORF YGL226w                              |
| 29                          | XII            | 790299              | AATTCATT                           | Z49198.1       | 2e -72               | CHS5 (CAL3) gene                                                      |
| 30                          | IV             | 352297              | TGAATGTC                           | NM_001180116.1 | 1e -06               | S288c Putative protein of unknown function                            |
| 31                          | VII            | 84707               | GGTAAAAT                           | Z72741.1       | 3e -81               | Chromosome VII reading frame ORF YGL219c                              |
| 32                          | X              | 78731               | <b>GCCTCGTA</b>                    | NM_001181620.1 | 4e -59               | S288c Protein kinase                                                  |
| 33                          | VII            | 514478              | TAATTACT                           | Z72797.1       | 7e -72               | Chromosome VII reading frame ORF YGR012w                              |
| 34                          | XVI            | 901730              | <b>GGCAGAAT</b>                    | J04184.1       | 1e -63               | Dolichol phosphate mannose synthase (DPM1) gene                       |
| 35                          | - <sup>b</sup> | -                   | <b>TATGAATG</b>                    | NM_001184395.1 | 1e -121              | S288c Retrotransposon TYA Gag gene                                    |
| <b>ActPase</b>              |                |                     |                                    |                |                      |                                                                       |
| 1                           | VI             | 204983              | <b>CACACGCC</b>                    | U09479.1       | 4e -147              | Histidinolphosphatase (HIS2) gene                                     |
| 2                           | XV             | 256401              | ATTTCCAC                           | Z74779.1       | 0.0                  | Chromosome XV reading frame ORF                                       |
| 3                           | X              | 210344              | GAGACGAG                           | NM_001181543.1 | 3e -26               | S288c GATA zinc finger protein and Dal80p homolog                     |
| 4                           | XII            | 107817              | GGTACAGA                           | NM_001182321.1 | 8e -50               | S288c Calcineurin A                                                   |
| 5                           | XVI            | 230894              | <b>ACTCTAAG</b>                    | Z73525.1       | 4e -42               | CXVI reading frame ORF YPL169c                                        |
| 6                           | XII            | 611863              | CATGGTTT                           | M24939.1       | 0.0                  | DNA topoisomerase (TOP3) gene                                         |
| 7                           | VIII           | 167614              | <b>TGTATATA</b>                    | X15484.1       | 1e -14               | Dipeptidyl aminopeptidase B (DPAP B)                                  |
| 8                           | VII            | 842662              | GTTTGAAG                           | X14629.1       | 5e -24               | MSM1 gene for mitochondrial methionyl-tRNA synthase                   |
| 9                           | XII            | 445181              | <b>AGGATATT</b>                    | S79456.1       | 7e -93               | tRNA-Gln, ACS2=acetyl-coenzyme A synthetase 2                         |
| 10                          | XIII           | 287458              | AAAGAAAC                           | M33270.1       | 1e -94               | High affinity hexose transporter-2 (HXT2) gene                        |
| 11                          | II             | 410391              | TCTAGCGC                           | J03724.1       | 0.0                  | Mitochondrial C-1-Tetrahydrofolate synthase gene (MIS1)               |
| 12                          | IV             | 778863              | <b>GCTTTACG</b>                    | NM_001180467.1 | 1e -41               | S288c SPS plasma membrane sensor system (Ssy1p-Ptr3p-Ssy5p)           |
| 13                          | VII            | 503923              | AATATGGG                           | NM_001181133.1 | 0.0                  | S288c Peroxisomal integral membrane protein                           |

|    |                |                     |                 |                |        |                                         |
|----|----------------|---------------------|-----------------|----------------|--------|-----------------------------------------|
| 14 | XV             | 369772              | <b>CGACCCAT</b> | NM_001183438.1 | 9e -92 | S288c Protein of unknown function       |
| 15 | XI             | 354898              | TACATATC        | X71621.1       | 0.0    | Genes ELM1 and PRI2                     |
| 16 | VII            | 757585              | <b>AATGTGTC</b> | X65470.1       | 7e -40 | PAS2 gene                               |
| 17 | XV             | 586815 <sup>e</sup> | GCCACAGT        | Z75047.1       | 9e -87 | Chromosome XV reading frame ORF YOR139c |
| 18 | - <sup>c</sup> | -                   | TGAACGTT        | M18354.1       | 2e -35 | Sigma repetitive element (TY3)          |

<sup>a</sup> *Ds* insertion sites where 5' and 3' flanking sequences were isolated are bold typed.

<sup>b</sup> In case of insertion into TYA retrotransposon the exact chromosomal localization is not possible (XVI, XV,XII, XVII, V, IV or I).

<sup>c</sup> In case of insertion into yeast sigma repetitive element (TY3) the exact chromosomal localization is not possible (XIV, XI, IX, VII or I).

<sup>d</sup> Sequences were BLASTed against GenBank (All GenBank+EMBL+DBJ+PDB sequences but no EST, STS, GSS,environmental samples or phase 0, 1 or 2 HTGS sequences)

<sup>e</sup> Short range transposition; *Ds* reintegration occurred on the same chromosome in a maximal distance of 72 kb from the donor site.

**Table S2 Distribution of *Ds* insertions on yeast chromosomes**

| Yeast chromosome |            |             | <i>Ds</i> insertions        |                       |                |                       |          |                       |
|------------------|------------|-------------|-----------------------------|-----------------------|----------------|-----------------------|----------|-----------------------|
| No.              | Size in kb | % of genome | <i>AcTPase<sub>4x</sub></i> |                       | <i>AcTPase</i> |                       | Total    |                       |
|                  |            |             | Observed                    | Expected <sup>b</sup> | Observed       | Expected <sup>b</sup> | Observed | Expected <sup>b</sup> |
| I                | 230        | 1.9         | -                           | 0.6                   | -              | 0.3                   | -        | 1                     |
| II               | 813        | 6.7         | 3                           | 2.3                   | 1              | 1.1                   | 4        | 3                     |
| III              | 315        | 2.6         | -                           | 0.9                   | -              | 0.4                   | -        | 1                     |
| IV               | 1522       | 12.6        | 3                           | 4.3                   | 1              | 2.1                   | 4        | 6                     |
| V                | 575        | 4.8         | 1                           | 1.6                   | -              | 0.8                   | 1        | 2                     |
| VI               | 270        | 2.2         | -                           | 0.8                   | 1              | 0.4                   | 1        | 1                     |
| VII              | 1091       | 9.0         | 6                           | 3.1                   | 3              | 1.5                   | 9        | 5                     |
| VIII             | 562        | 4.7         | -                           | 1.6                   | 1              | 0.8                   | 1        | 3                     |
| IX               | 440        | 3.7         | 1                           | 1.2                   | -              | 0.6                   | 1        | 2                     |
| X                | 745        | 6.2         | 2                           | 2.1                   | 1              | 1.0                   | 3        | 3                     |
| XI               | 666        | 5.5         | 2                           | 1.9                   | 1              | 0.9                   | 3        | 3                     |
| XII              | 1078       | 8.9         | 5                           | 3.0                   | 3              | 1.5                   | 8        | 5                     |
| XIII             | 924        | 7.7         | 1                           | 2.6                   | 1              | 1.3                   | 2        | 4                     |
| XIV              | 784        | 6.5         | -                           | 2.2                   | -              | 1.1                   | -        | 3                     |
| XV <sup>a</sup>  | 1091       | 9.1         | 7                           | 3.1                   | 3              | 1.5                   | 10       | 5                     |
| XVI              | 948        | 7.9         | 3                           | 1.3                   | 1              | 1.3                   | 3        | 4                     |
| Σ                | 12057      | 100         | 34                          | 34                    | 17             | 17                    | 51       | 51                    |

<sup>a</sup> Yeast chromosome with *Ds* launch pad in *ade2* locus.

<sup>b</sup> Number of expected insertions was calculated based on the size of each chromosome.

**Table S3 Primer sequences (5' to 3')**

---

| Primers for site directed mutagenesis |                                                                            |
|---------------------------------------|----------------------------------------------------------------------------|
| E249A                                 | CAATATTGTAGAACATGCGTACTTTGTTGAG<br>CTCAACAAAGTACGCATGTTCTACAATATTG         |
| D301A                                 | CTCGCTTCAGTACAACACTATGGCTATGTGGACA<br>ACTGAACATCTTTTAGTTTTCCATACTTTTCTTTTC |
| E336A                                 | GCTTTTTTCATGTTGCAGGGCGCCCACTGG<br>CCAGTGTGGCGCCCTGCAACATGAAAAAAGC          |
| D367A                                 | TGCCTTGTCTTTGGCTAATGCTAGTGC<br>AACAAATTTTTCTCAATGTTCCACTTAACCA             |
| D459A                                 | GGGATCTCATATGCTGTCTCAACTAGATGG<br>CCATCTAGTTGAGACAGCATATGAGATCCC           |
| D545A                                 | GGATTTGATTGCCCAATGGTGTGTTC<br>GAACACACCATTGGGCAATCAAATCC                   |
| E719A                                 | CTGTTGCTTCTGCGTCTGCGTTCAGTGC<br>GCACTGAACGCAGACGCAGAAGCAACAG               |

---

| Splinkerette-PCR gene specific primers |                              |
|----------------------------------------|------------------------------|
| primary PCR <i>Ds</i> 5' end           | GGATAAAACTAACAAAATCGGTTATACG |
| primary PCR <i>Ds</i> 3' end           | CCGTATTTATCCCGTTGTTTTGTTA    |
| secondary PCR <i>Ds</i> 5' end         | CGATAACGGTCGGTACGGGATTTTC    |
| secondary PCR <i>Ds</i> 3' end         | CCCGTTTTGTTTCCGTCCCGCAAG     |

---

| Primers for amplification of empty <i>Ds</i> donor sites in <i>Arabidopsis</i> |                        |
|--------------------------------------------------------------------------------|------------------------|
| P1                                                                             | GGAAGTTCATTTCAATTTGGAG |
| P2                                                                             | TCGCCCTCGCCCTCGCCGGAC  |
| P3                                                                             | GATCTCGGTGACGGGCAGGAC  |

---
