# Supplementary material
Source: PubMed Central journal article supplement (PMC3389971)
Supplement: supp_112.139642_TableS2.pdf [file supp_112.139642_TableS2.pdf]

**Table S2 Distribution of *Ds* insertions on yeast chromosomes**

| Yeast chromosome |            |             | <i>Ds</i> insertions        |                       |                |                       |          |                       |
|------------------|------------|-------------|-----------------------------|-----------------------|----------------|-----------------------|----------|-----------------------|
| No.              | Size in kb | % of genome | <i>AcTPase<sub>4x</sub></i> |                       | <i>AcTPase</i> |                       | Total    |                       |
|                  |            |             | Observed                    | Expected <sup>b</sup> | Observed       | Expected <sup>b</sup> | Observed | Expected <sup>b</sup> |
| I                | 230        | 1.9         | -                           | 0.6                   | -              | 0.3                   | -        | 1                     |
| II               | 813        | 6.7         | 3                           | 2.3                   | 1              | 1.1                   | 4        | 3                     |
| III              | 315        | 2.6         | -                           | 0.9                   | -              | 0.4                   | -        | 1                     |
| IV               | 1522       | 12.6        | 3                           | 4.3                   | 1              | 2.1                   | 4        | 6                     |
| V                | 575        | 4.8         | 1                           | 1.6                   | -              | 0.8                   | 1        | 2                     |
| VI               | 270        | 2.2         | -                           | 0.8                   | 1              | 0.4                   | 1        | 1                     |
| VII              | 1091       | 9.0         | 6                           | 3.1                   | 3              | 1.5                   | 9        | 5                     |
| VIII             | 562        | 4.7         | -                           | 1.6                   | 1              | 0.8                   | 1        | 3                     |
| IX               | 440        | 3.7         | 1                           | 1.2                   | -              | 0.6                   | 1        | 2                     |
| X                | 745        | 6.2         | 2                           | 2.1                   | 1              | 1.0                   | 3        | 3                     |
| XI               | 666        | 5.5         | 2                           | 1.9                   | 1              | 0.9                   | 3        | 3                     |
| XII              | 1078       | 8.9         | 5                           | 3.0                   | 3              | 1.5                   | 8        | 5                     |
| XIII             | 924        | 7.7         | 1                           | 2.6                   | 1              | 1.3                   | 2        | 4                     |
| XIV              | 784        | 6.5         | -                           | 2.2                   | -              | 1.1                   | -        | 3                     |
| XV <sup>a</sup>  | 1091       | 9.1         | 7                           | 3.1                   | 3              | 1.5                   | 10       | 5                     |
| XVI              | 948        | 7.9         | 3                           | 1.3                   | 1              | 1.3                   | 3        | 4                     |
| Σ                | 12057      | 100         | 34                          | 34                    | 17             | 17                    | 51       | 51                    |

<sup>a</sup> Yeast chromosome with *Ds* launch pad in *ade2* locus.

<sup>b</sup> Number of expected insertions was calculated based on the size of each chromosome.
