# Supplementary material
Source: PubMed Central journal article supplement (PMC3389971)
Supplement: supp_112.139642_TableS3.pdf [file supp_112.139642_TableS3.pdf]

**Table S3 Primer sequences (5' to 3')**

---

| Primers for site directed mutagenesis |                                                                            |
|---------------------------------------|----------------------------------------------------------------------------|
| E249A                                 | CAATATTGTAGAACATGCGTACTTTGTTGAG<br>CTCAACAAAGTACGCATGTTCTACAATATTG         |
| D301A                                 | CTCGCTTCAGTACAACACTATGGCTATGTGGACA<br>ACTGAACATCTTTTAGTTTTCCATACTTTTCTTTTC |
| E336A                                 | GCTTTTTTCATGTTGCAGGGCGCCACTGG<br>CCAGTGTGGCGCCCTGCAACATGAAAAAAGC           |
| D367A                                 | TGCCTTGTCTTTGGCTAATGCTAGTGC<br>AACAAATTTTTCTCAATGTTCCACTTAACCA             |
| D459A                                 | GGGATCTCATATGCTGTCTCAACTAGATGG<br>CCATCTAGTTGAGACAGCATATGAGATCCC           |
| D545A                                 | GGATTTGATTGCCCAATGGTGTGTTT<br>GAACACACCATTGGGCAATCAAATCC                   |
| E719A                                 | CTGTTGCTTCTGCGTCTGCGTTCAGTGC<br>GCACTGAACGCAGACGCAGAAGCAACAG               |

---

| Splinkerette-PCR gene specific primers |                              |
|----------------------------------------|------------------------------|
| primary PCR <i>Ds</i> 5' end           | GGATAAAACTAACAAAATCGGTTATACG |
| primary PCR <i>Ds</i> 3' end           | CCGTATTTATCCCGTTGTTTTGTTA    |
| secondary PCR <i>Ds</i> 5' end         | CGATAACGGTCGGTACGGGATTTTC    |
| secondary PCR <i>Ds</i> 3' end         | CCCGTTTTGTTTCCGTCCCGCAAG     |

---

| Primers for amplification of empty <i>Ds</i> donor sites in <i>Arabidopsis</i> |                        |
|--------------------------------------------------------------------------------|------------------------|
| P1                                                                             | GGAAGTTCATTTCAATTTGGAG |
| P2                                                                             | TCGCCCTCGCCCTCGCCGGAC  |
| P3                                                                             | GATCTCGGTGACGGGCAGGAC  |

---
